# Supplementary material for: Climate Change Helps Polar Invasives Establish and Flourish: Evidence from Long-Term Monitoring of the Blowfly Calliphora vicina
Source: MDPI journal article supplement (doi:10.3390/biology12010111), 2023-01-10

**Figure S1** - Phenological curves derived for a population of *C. vicina* based on monitoring data (Abundance per Trap Day) across a season in the years 1993 – 2020. The vertical line in each plot indicates the calendar year change.

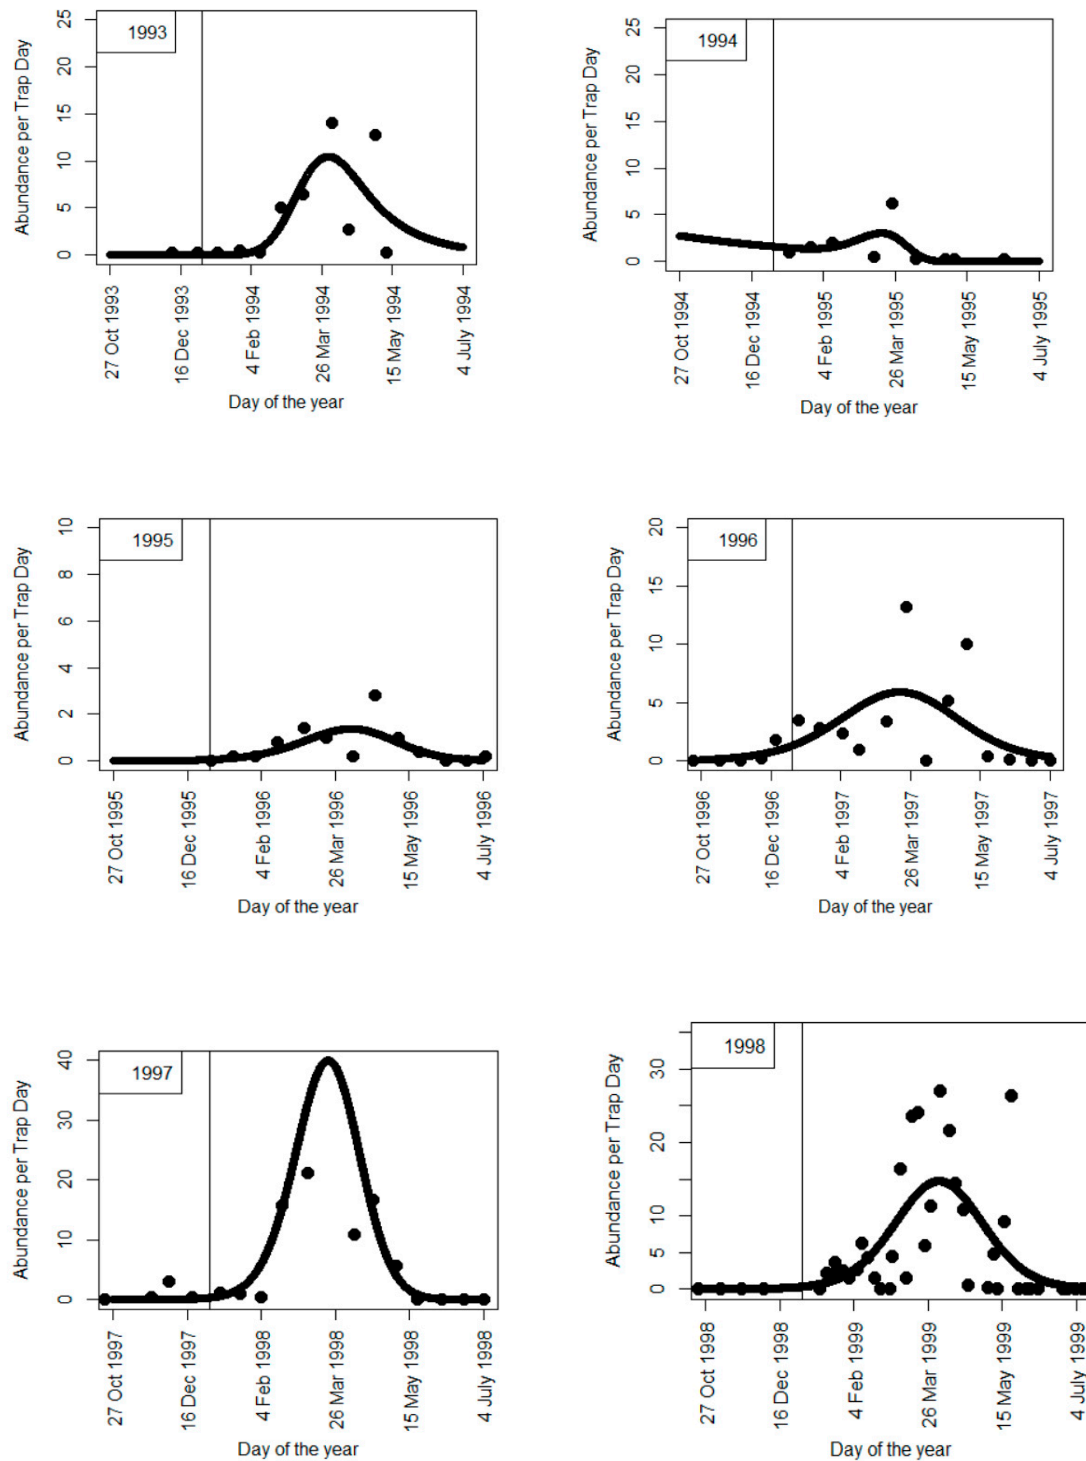

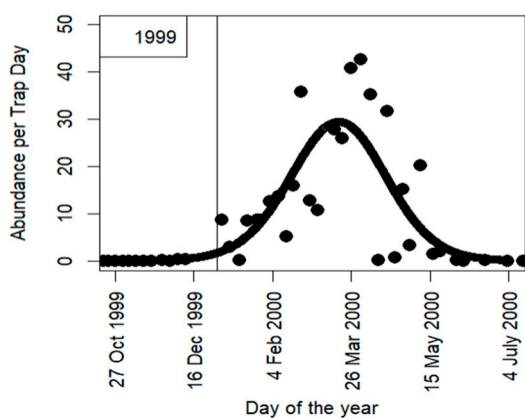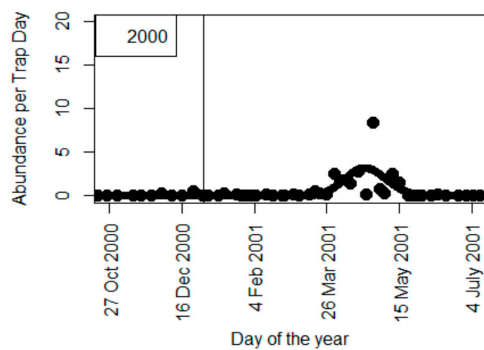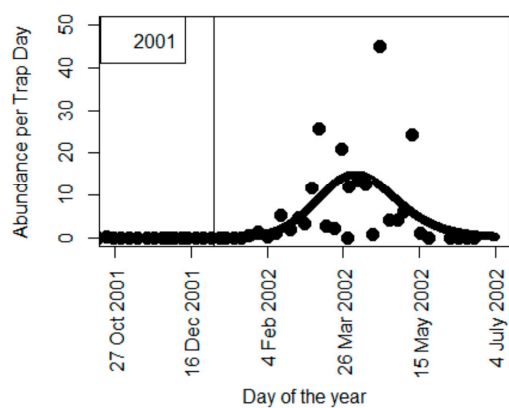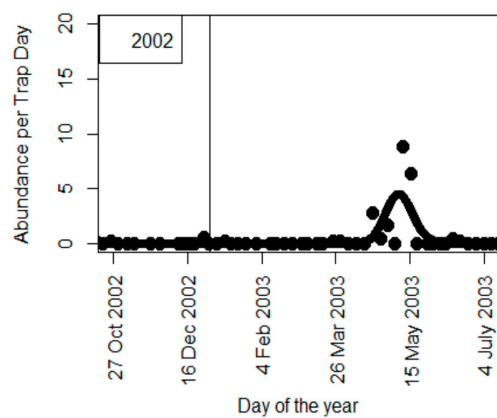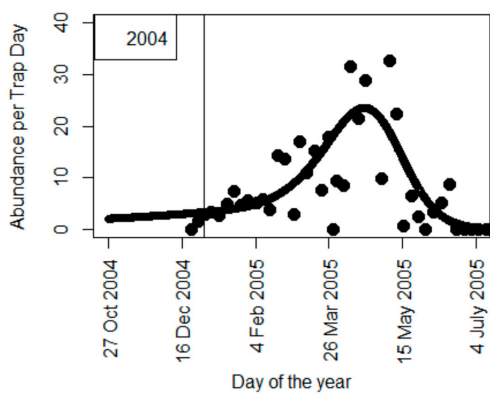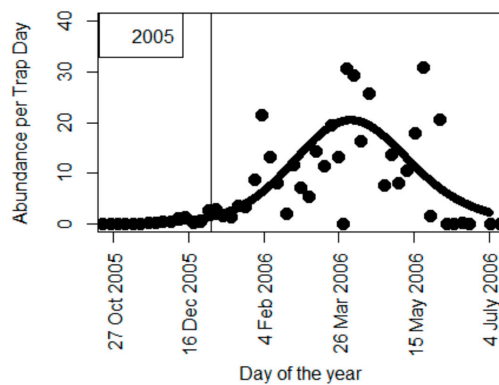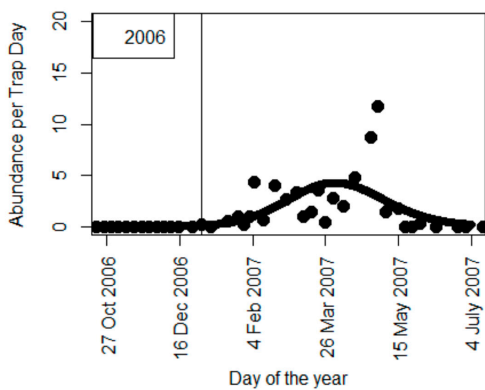

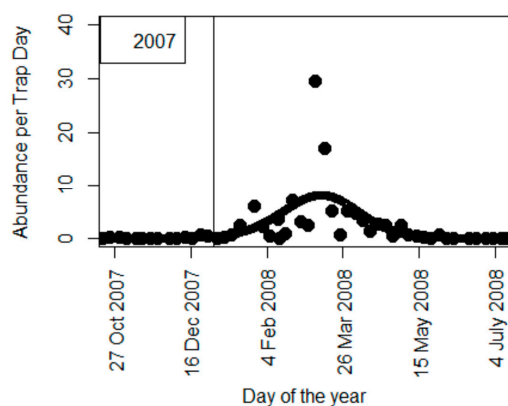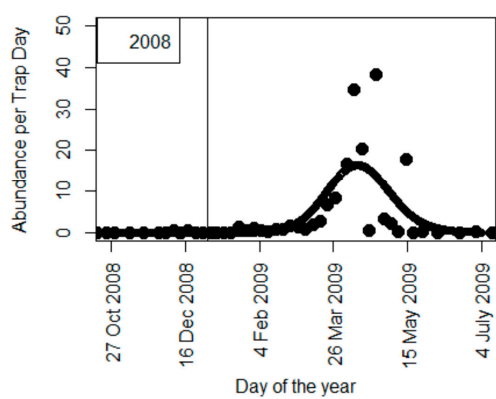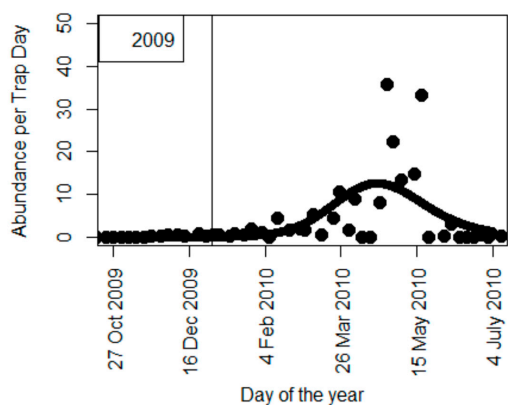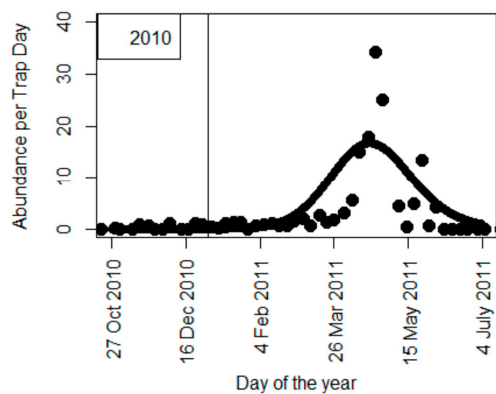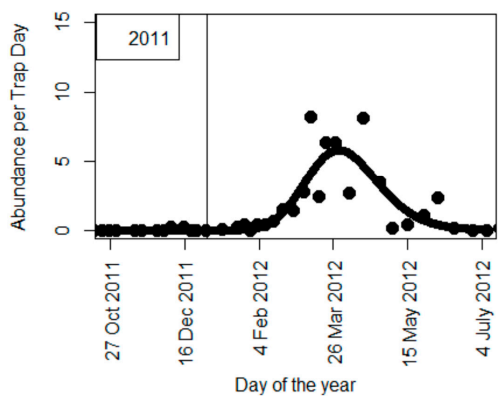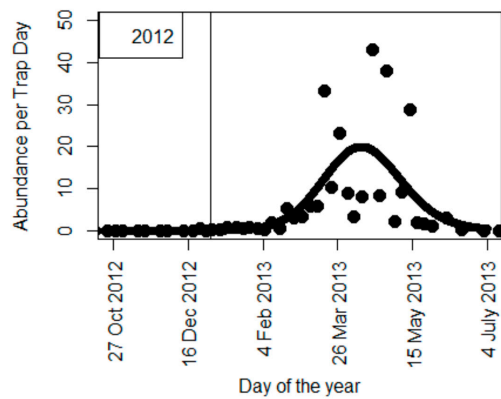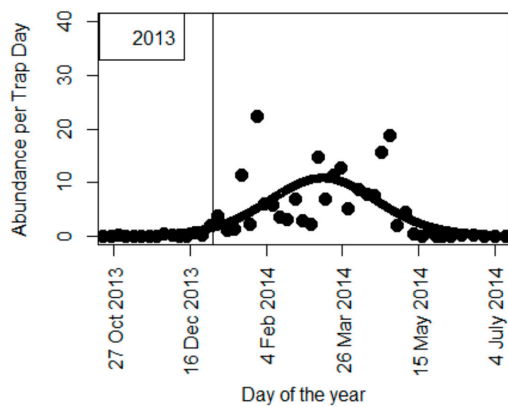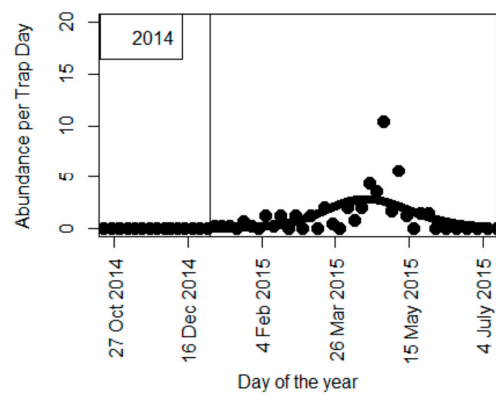

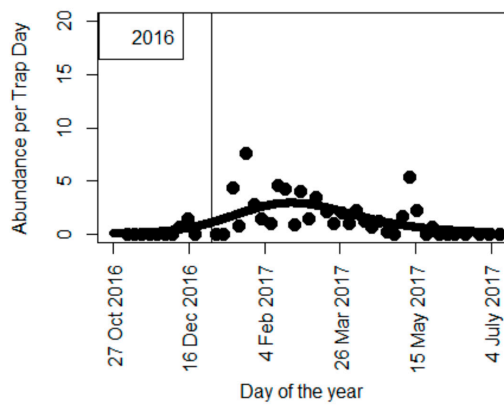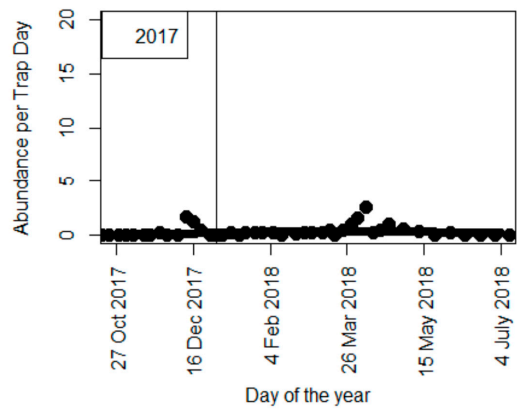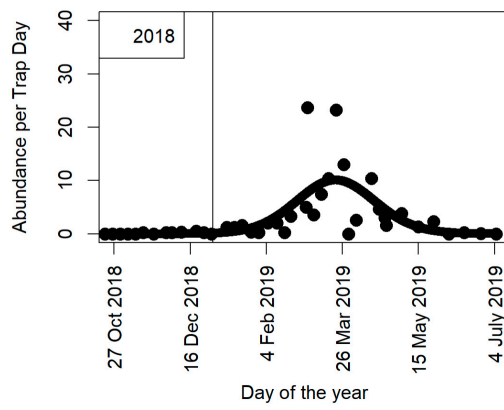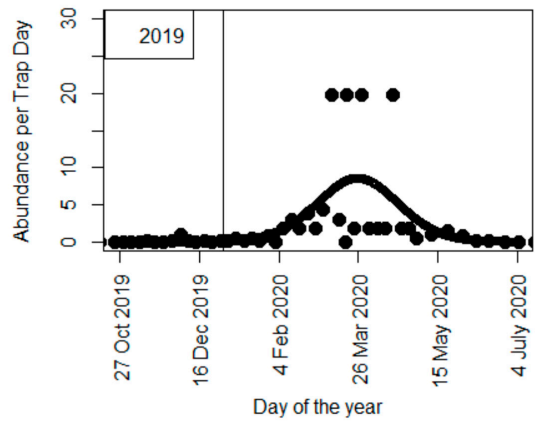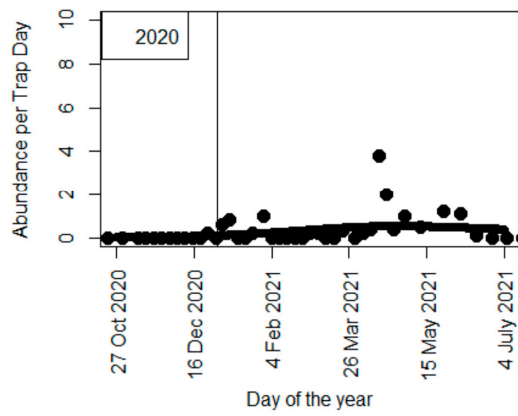

Supplement: s1 [file s1]
